# Supplementary material for: Mapping Methods: Charting Future Priorities for Research Methods in Dissemination and Implementation Science
Source: Research Square preprint supplement (doi:10.21203/rs.3.rs-8874640/v1), 2026-04-29
Supplement: Supplementary file 1 [file fa23d308bfe8a04e43751f8c.docx]

**Supplemental Table.** Statements Organized by Priority Quadrant

| **State-ment #** | **Statement** | **Cluster** |
| --- | --- | --- |
| **Yellow quadrant: high importance, low frequency** | | |
| 33 | Patient-or site-level between groups comparison to assess implementation's effect on health care disparities | Analytic methods |
| 74 | Adaptive designs (MOST, SMART) | Analytic methods |
| 7 | Designing implementation strategies specifically to reduce disparities in implementation | Theoretical and conceptual approaches |
| 6 | Intentional use of principles of designing for dissemination | Designing for dissemination |
| 60 | Development of dissemination tools that can translate research results into accessible and actionable information for community stakeholders | Designing for dissemination |
| 4 | Planning for adaptations of implementation and intervention strategies | Documenting and adapting implementation |
| 28 | Pragmatic measurement of organizational context | Documenting and adapting implementation |
| 44 | Methods/approaches to disentangle complex interventions from implementation strategies | Documenting and adapting implementation |
| 51 | Measuring adaptations of implementation and intervention strategies | Documenting and adapting implementation |
| 59 | Documenting implementation strategies in detail | Documenting and adapting implementation |
| 89 | Methods to distinguish between core specifications/attributes of intervention and those that must be adapted to context | Documenting and adapting implementation |
| 10 | Using core measures across studies with different innovations and different settings | Measurement and evaluation |
| 14 | Understanding mechanisms for maintained or widened implementation disparities in care | Mechanism and cost analyses |
| 26 | Psychometrics (e.g., exploratory factor analysis [EFA], confirmatory factor analysis [CFA], varimax rotation, etc.) for developing and validating measures and instruments | Mechanism and cost analyses |
| 45 | Methods to test mechanisms of implementation strategies | Mechanism and cost analyses |
| 62 | Cost-effectiveness studies of implementation strategies/methods | Mechanism and cost analyses |
| 86 | Cost analyses | Mechanism and cost analyses |
| 55 | Identifying opportunities for rapid cycle research that builds on activities already underway in practice | Rapid cycle methods |
| 17 | Study designs that follow programs well after initial implementation | Applied and adaptable methods |
| 21 | Scaling-out designs | Applied and adaptable methods |
| 24 | Quantifying and communicating the value of partnerships with stakeholders | Partnerships and co-creation |
| 65 | Community-based Participatory Research | Partnerships and co-creation |
| 68 | Co-creation with providers | Partnerships and co-creation |
| 69 | Co-creation with policy makers and end-users | Partnerships and co-creation |
| 43 | Mixed methods research that includes an explicit focus on economic evaluation | Systems and computational approaches |
| 75 | Able to capture dynamism in the system | Systems and computational approaches |
| 12 | User-centered design | User-centered design |
| 22 | Rapid cycle qualitative methods to engage key stakeholders | User-centered design |
| 30 | Pragmatic approaches that allow for real world use | User-centered design |
| 50 | Methods involving user or human-centered design approaches | User-centered design |
| 61 | Designs that consider diverse settings and cultures. | User-centered design |
| **Green quadrant: high importance, high frequency** | | |
| 40 | Multilevel methods that can capture ecological and contextual factors | Analytic methods |
| 5 | Mapping determinants of the implementation of programs and policies onto potential strategies for promoting implementation | Theoretical and conceptual approaches |
| 85 | Examination of process as well as outcome methods | Documenting and adapting implementation |
| 9 | Valid and reliable tools to measure implementation outcomes | Measurement and evaluation |
| 49 | Methods that capture organizational context | Measurement and evaluation |
| 57 | Evaluation of implementation outcomes | Measurement and evaluation |
| 71 | Assessing mechanisms (mediators, moderators) | Mechanism and cost analyses |
| 48 | Methods that emphasize external validity (e.g., generalizability) | Applied and adaptable methods cations |
| 19 | Stakeholder engaged, participatory designs | Partnerships and co-creation |
| 25 | Qualitative study designs and analysis (e.g., thematic content analysis, rapid analysis) | Study designs |
| 41 | Multilevel designs | Study designs |
| 42 | Mixed-methods (qualitative and quantitative) | Study designs |
| 82 | Ethnographic and qualitative research methods | Study designs |
| 31 | Practice-based research | User-centered design |
| 72 | Assess the perspective of multiple stakeholders | User-centered design |
| **Orange quadrant: low importance, high frequency** | | |
| 36 | Observation (e.g., surveys, interviews) of determinants of the implementation of evidence-based chronic disease prevention and control programs and policies | Analytic methods |
| 56 | Hierarchical or multilevel linear modeling | Analytic methods |
| 87 | Longitudinal analytic methods | Analytic methods |
| 1 | Logic models to separate implementation activities and outcomes from content theory | Theoretical and conceptual approaches |
| 3 | Use of frameworks (e.g., CFIR) | Theoretical and conceptual approaches |
| 11 | Using a framework and relevant tools to collect data with participants | Theoretical and conceptual approaches |
| 18 | Study designs that focus more on implementation processes, and less on implementation outcomes | Documenting and adapting implementation |
| 46 | Methods that take advantage of rich administrative data (i.e., big data) | Measurement and evaluation |
| 47 | Methods that make greater use of clinical administrative data, such as those from electronic health records. | Measurement and evaluation |
| 66 | Community-academic partnerships | Partnerships and co-creation |
| 13 | D&I research should use designs and methods from other disciplines | Study designs |
| 27 | Prospective designs | Study designs |
| 34 | Observational study designs (e.g., cross-sectional, longitudinal) | Study designs |
| 35 | Observational and experimental | Study designs |
| 80 | Randomized controlled trials (RCTs) and variations thereof (e.g., cluster RCT, stepped-wedge RCTs, pragmatic RCTs) | Study designs |
| 84 | Longitudinal study designs | Study designs |
| **Blue quadrant: low importance, low frequency** | | |
| 2 | Causal inference (epidemiology) methods | Analytic methods |
| 20 | Simulation methods | Analytic methods |
| 76 | Dyadic data analysis for analyses between dyads (e.g., patients-providers, providers-providers, policymakers-policymakers) | Analytic methods |
| 81 | Driver diagrams to help define highest leverage change concepts to separate implementation activities and outcomes from "content theory" | Theoretical and conceptual approaches |
| 8 | Consensus building methods between inner and outer settings. | Designing for dissemination |
| 53 | Knowledge mobilization methods | Designing for dissemination |
| 67 | Communications and marketing (for dissemination) | Designing for dissemination |
| 29 | Pragmatic assessment of inner and outer setting factors | Documenting and adapting implementation |
| 83 | Greater use of organizational data | Measurement and evaluation |
| 32 | Pooling data from several studies to ask several scientific questions | Mechanism and cost analyses |
| 73 | Agent-based models of policy implementation | Mechanism and cost analyses |
| 77 | Mediated moderation and moderated mediation | Mechanism and cost analyses |
| 23 | Rapid cycle methods applied to complex interventions | Rapid cycle methods |
| 63 | Continuous quality improvement designs | Rapid cycle methods |
| 88 | Rapid cycle research | Rapid cycle methods |
| 54 | Iterative approaches | Applied and adaptable methods |
| 58 | Ethnographic studies of organizational settings within which implementation is occurring. | Applied and adaptable methods |
| 39 | Multiple stakeholder analysis methods | Partnerships and co-creation |
| 70 | Co-creation with patients | Partnerships and co-creation |
| 15 | Take advantage of natural experiments. | Study designs |
| 52 | Leveraging interrupted time series designs to examine retroactive or prospective policy changes using routinely collected data | Study designs |
| 79 | Quasi-experimental designs, such as interrupted time series and regression discontinuity | Study designs |
| 16 | Systems science methods that capture heterogeneity, social structure, and system dynamics | Systems and computational approaches |
| 37 | Network analysis methods that can be used to assess the reach and adoption of programs across social and health systems | Systems and computational approaches |
| 38 | Network analysis | Systems and computational approaches |
| 64 | Computational modeling of healthcare and public health systems | Systems and computational approaches |
| 78 | Mediational analysis | Systems and computational approaches |
